# Supplementary material
Source: PubMed Central journal article supplement (PMC4224361)
Supplement: supp_kwu222_kwu222supp.pdf [file supp_kwu222_kwu222supp.pdf]

## **WEB MATERIAL**

### **Sleep Duration and Total and Cause-Specific Mortality in a Large US Cohort: Interrelationships With Physical Activity, Sedentary Behavior, and Body Mass Index**

Qian Xiao\*, Sarah K. Keadle, Albert R. Hollenbeck, and Charles E. Matthews

\*Correspondence to Dr. Qian Xiao, Division of Cancer Epidemiology and Genetics, National Cancer Institute, 9609 Medical Center Drive, Rockville, MD 20850 (e-mail: [qian.xiao@nih.gov](mailto:qian.xiao@nih.gov)).

**Web Table 1.** Association between baseline sleep duration and mortality among healthy <sup>a</sup> participants who reported never napping in the NIH-AARP Diet and Health Study (1995–1996)

|                                       | Sleep Duration    |                   |           |                   |
|---------------------------------------|-------------------|-------------------|-----------|-------------------|
|                                       | <5 Hours          | 5–6 Hours         | 7–8 Hours | ≥9 Hours          |
| All-cause mortality                   |                   |                   |           |                   |
| No. of deaths                         | 393               | 4,141             | 9,132     | 606               |
| Multivariate RR (95% CI) <sup>b</sup> | 1.20 (1.08, 1.33) | 1.05 (1.01, 1.09) | Referent  | 1.14 (1.05, 1.24) |
| Cardiovascular mortality              |                   |                   |           |                   |
| No. of deaths                         | 91                | 909               | 1,933     | 137               |
| Multivariate RR (95% CI) <sup>b</sup> | 1.26 (1.02, 1.55) | 1.08 (1.00, 1.17) | Referent  | 1.18 (0.99, 1.40) |
| Cancer mortality                      |                   |                   |           |                   |
| No. of deaths                         | 123               | 1,503             | 3,614     | 199               |
| Multivariate RR (95% CI) <sup>b</sup> | 1.02 (0.85, 1.22) | 0.97 (0.91, 1.03) | Referent  | 0.99 (0.85, 1.14) |

Abbreviations: CI, confidence interval; NIH, National Institutes of Health; RR, relative risk.

<sup>a</sup> Defined as reporting fair or better health, and no cancer, heart disease, stroke, or emphysema.

<sup>b</sup> Adjusted for sex (male and female), age at baseline (continuous), race/ethnicity (non-Hispanic white, non-Hispanic black, Hispanic, and Asian, Pacific Islander, American Indian/Alaskan Native, or other), marital status (married, widowed, divorced, separated, and never married), education (less than 12 years, 12 years, post high school, some college and college/post graduate), self-reported health (excellent, very good, good, and fair), smoking (never, former and current smoker), smoking dose (0, 1–10, 11–20, 21–30, 31–40, 41–50, 51–60, and >60 cigarettes per day), time since quitting (never quit, ≥10, 5–9, 1–4, <1 years), alcohol drinking (continuous), moderate-to-vigorous physical activity (never, rarely, <1, 1–3, 4–7, and >7 hours/week), television viewing (None, <1, 1–2, 3–4, 5–6, 7–8 and 9+ hours/day), and baseline body mass index (weight (kg)/height (m)<sup>2</sup>; <18.5, 18.5–<25, 25–<30, 30–<35, 35+).

**Web Table 2.** Association between baseline sleep duration and mortality, by MVPA, among 239,907 healthy <sup>a</sup> participants in the NIH-AARP Diet and Health Study (1995–1996)

| MVPA                                  | Sleep Duration    |                   |           |                   |
|---------------------------------------|-------------------|-------------------|-----------|-------------------|
|                                       | <5 Hours          | 5–6 Hours         | 7–8 Hours | ≥9 Hours          |
| <i>All-Cause Mortality</i>            |                   |                   |           |                   |
| Never<1 hours/week                    |                   |                   |           |                   |
| No. of deaths                         | 545               | 4,102             | 26,513    | 621               |
| Multivariate <sup>b</sup> RR (95% CI) | 1.28 (1.17, 1.40) | 1.02 (0.99, 1.06) | Referent  | 1.20 (1.10, 1.30) |
| 1–3 hours/week                        |                   |                   |           |                   |
| No. of deaths                         | 318               | 3,577             | 6,754     | 397               |
| Multivariate <sup>b</sup> RR (95% CI) | 1.23 (1.10, 1.38) | 1.07 (1.02, 1.11) | Referent  | 1.07 (0.96, 1.18) |
| ≥4 hours/week                         |                   |                   |           |                   |
| No. of deaths                         | 557               | 6,451             | 12,776    | 705               |
| Multivariate <sup>b</sup> RR (95% CI) | 1.13 (1.04, 1.23) | 1.06 (1.02, 1.09) | Referent  | 1.10 (1.02, 1.19) |
| <i>Cardiovascular Mortality</i>       |                   |                   |           |                   |
| Never<1 hours/week                    |                   |                   |           |                   |
| No. of deaths                         | 181               | 1,144             | 2,037     | 155               |
| Multivariate <sup>b</sup> RR (95% CI) | 1.46 (1.25, 1.71) | 1.01 (0.94, 1.09) | Referent  | 1.04 (0.89, 1.23) |
| 1–3 hours/week                        |                   |                   |           |                   |
| No. of deaths                         | 96                | 973               | 1,753     | 124               |
| Multivariate <sup>b</sup> RR (95% CI) | 1.43 (1.16, 1.76) | 1.12 (1.03, 1.21) | Referent  | 1.27 (1.06, 1.53) |
| ≥4 hours/week                         |                   |                   |           |                   |
| No. of deaths                         | 149               | 1,681             | 3,178     | 164               |
| Multivariate <sup>b</sup> RR (95% CI) | 1.18 (1.00, 1.39) | 1.09 (1.03, 1.16) | Referent  | 1.02 (0.87, 1.19) |
| <i>Cancer Mortality</i>               |                   |                   |           |                   |
| Never<1 hours/week                    |                   |                   |           |                   |
| No. of deaths                         | 159               | 1,422             | 2,674     | 186               |
| Multivariate <sup>b</sup> RR (95% CI) | 1.11 (0.94, 1.30) | 0.99 (0.93, 1.05) | Referent  | 1.12 (0.88, 1.18) |
| 1–3 hours/week                        |                   |                   |           |                   |
| No. of deaths                         | 95                | 1,267             | 2,600     | 138               |
| Multivariate <sup>b</sup> RR (95% CI) | 0.99 (0.81, 1.22) | 0.99 (0.93, 1.06) | Referent  | 0.98 (0.83, 1.17) |
| ≥4 hours/week                         |                   |                   |           |                   |
| No. of deaths                         | 210               | 2,487             | 5,140     | 266               |
| Multivariate <sup>b</sup> RR (95% CI) | 1.12 (0.97, 1.28) | 1.02 (0.98, 1.07) | Referent  | 1.06 (0.93, 1.19) |

Abbreviations: CI, confidence interval; MVPA, moderate-to-vigorous physical activity; NIH, National Institutes of Health; RR, relative risk.

*P* for interaction between sleep duration and MVPA: 0.40 for all-cause mortality, 0.51 for cardiovascular mortality, and 0.49 for cancer mortality.

<sup>a</sup> Defined as reporting fair or better health, and no cancer, heart disease, stroke, or emphysema.

<sup>b</sup> Adjusted for age, sex, race/ethnicity, marital status, education, self-reported health, smoking status, smoking dose, years since quitting smoking, and alcohol drinking.

**Web Table 3.** Association between baseline sleep duration and mortality, by TV viewing, among 239,907 healthy<sup>a</sup> participants in the NIH-AARP Diet and Health Study (1995–1996)

| TV Viewing                            | Sleep Duration    |                   |           |                   |
|---------------------------------------|-------------------|-------------------|-----------|-------------------|
|                                       | <5 Hours          | 5–6 Hours         | 7–8 Hours | ≥9 Hours          |
| <i>All-Cause Mortality</i>            |                   |                   |           |                   |
| None–2 hours/day                      |                   |                   |           |                   |
| No. of deaths                         | 314               | 4,034             | 8,275     | 473               |
| Multivariate <sup>b</sup> RR (95% CI) | 1.26 (1.12, 1.41) | 1.06 (1.02, 1.10) | Referent  | 1.05 (0.95, 1.15) |
| 3–4 hours/day                         |                   |                   |           |                   |
| No. of deaths                         | 531               | 6,395             | 12,243    | 747               |
| Multivariate <sup>b</sup> RR (95% CI) | 1.14 (1.04, 1.24) | 1.07 (1.04, 1.10) | Referent  | 1.18 (1.09, 1.27) |
| ≥5 hours/day                          |                   |                   |           |                   |
| No. of deaths                         | 575               | 3,701             | 6,309     | 503               |
| Multivariate <sup>b</sup> RR (95% CI) | 1.21 (1.11, 1.32) | 1.00 (0.96, 1.04) | Referent  | 1.14 (1.04, 1.25) |
| <i>Cardiovascular Mortality</i>       |                   |                   |           |                   |
| None–2 hours/day                      |                   |                   |           |                   |
| No. of deaths                         | 69                | 1,048             | 2,077     | 114               |
| Multivariate <sup>b</sup> RR (95% CI) | 1.06 (0.83, 1.35) | 1.09 (1.01, 1.17) | Referent  | 0.98 (0.81, 1.18) |
| 3–4 hours/day                         |                   |                   |           |                   |
| No. of deaths                         | 173               | 1,720             | 3,161     | 181               |
| Multivariate <sup>b</sup> RR (95% CI) | 1.39 (1.19, 1.62) | 1.10 (1.04, 1.17) | Referent  | 1.08 (0.93, 1.26) |
| ≥5 hours/day                          |                   |                   |           |                   |
| No. of deaths                         | 184               | 1,030             | 1,730     | 148               |
| Multivariate <sup>b</sup> RR (95% CI) | 1.38 (1.18, 1.61) | 1.00 (0.93, 1.08) | Referent  | 1.22 (1.03, 1.44) |
| <i>Cancer Mortality</i>               |                   |                   |           |                   |
| None–2 hours/day                      |                   |                   |           |                   |
| No. of deaths                         | 113               | 1,566             | 3,392     | 171               |
| Multivariate <sup>b</sup> RR (95% CI) | 1.15 (0.95, 1.39) | 1.01 (0.95, 1.08) | Referent  | 0.96 (0.82, 1.12) |
| 3–4 hours/day                         |                   |                   |           |                   |
| No. of deaths                         | 170               | 2,379             | 4,763     | 274               |
| Multivariate <sup>b</sup> RR (95% CI) | 0.99 (0.85, 1.15) | 1.03 (0.98, 1.09) | Referent  | 1.14 (1.01, 1.29) |
| ≥5 hours/day                          |                   |                   |           |                   |
| No. of deaths                         | 181               | 1,231             | 2,259     | 145               |
| Multivariate <sup>b</sup> RR (95% CI) | 1.15 (0.99, 1.34) | 0.95 (0.88, 1.02) | Referent  | 0.94 (0.79, 1.11) |

Abbreviations: CI, confidence interval; NIH, National Institutes of Health; RR, relative risk; TV, television.

*P* for interaction between sleep duration and TV viewing: 0.16 for all-cause mortality, 0.42 for cardiovascular mortality, and 0.70 for cancer mortality.

<sup>a</sup> Defined as reporting fair or better health, and no cancer, heart disease, stroke, or emphysema.

<sup>b</sup> Adjusted for age, sex, race/ethnicity, marital status, education, self-reported health, smoking status, smoking dose, years since quitting smoking, and alcohol drinking.
